# Supplementary material for: Rice Sesquiterpene Plays Important Roles in Antixenosis against Brown Planthopper in Rice
Source: MDPI journal article supplement (doi:10.3390/plants10061049), 2021-05-22
Supplement: s1 [file s1]

## Supplementary Figure

(A)

|            | ATHB-1                                                                          |     |
|------------|---------------------------------------------------------------------------------|-----|
| JHN        | TTTGACA <b>AA</b> TTAATTATTGCTAGAACTGTTTCATGAATATTGTAATGTTATTTTCACAAAG          | 358 |
| ARC10550   | TTTGACA <b>AA</b> TTAATTATTGCTAGAACTGTTTCATGAATATTGTAATGTTATTTTCACAAAG          | 353 |
| ASD7       | TTTGACA <b>AA</b> TTAATTATTGCTAGAACTGTTTCATGAATATTGTAATGTTATTTTCACAAAG          | 353 |
| TN1        | TTTGACA <b>AA</b> TTAATTATTGCTAGAACTGTTTCATGAATATTGTAATGTTATTTTCACAAAG          | 356 |
| PTB33      | TTTGACA <b>AA</b> TTAATTATTGCTAGAACTGTTTCATGAATATTGTAATGTTATTTTCACAAAG          | 353 |
| RH         | TTTGACA <b>AA</b> TTAATTATTGCTAGAACTGTTTCATGAATATTGTAATGTTATTTTCACAAAG          | 355 |
| IL162      | TTTGACA <b>AA</b> TTAATTATTGCTAGAACTGTTTCATGAATATTGTAATGTTATTTTCACAAAG          | 356 |
| IL302      | TTTGACA <b>AA</b> TTAATTATTGCTAGAACTGTTTCATGAATATTGTAATGTTATTTTCACAAAG          | 347 |
| IL308      | TTTGACA <b>AA</b> TTAATTATTGCTAGAACTGTTTCATGAATATTGTAATGTTATTTTCACAAAG          | 357 |
| Mudgo      | TTTGACA <b>AA</b> TTAATTATTGCTAGAACTGTTTCATGAATATTGTAATGTTATTTTCACAAAG          | 358 |
| Pokkali    | TTTGACA <b>AA</b> TTAATTATTGCTAGAACTGTTTCATGAATATTGTAATGTTATTTTCACAAAG          | 340 |
| Nipponbare | TTTGACA <b>AA</b> TTAATTATTGCTAGAACTGTTTCATGAATATTGTAATGTTATTTTCACAAAG          | 343 |
| IL143      | TTTGACA <b>AA</b> TTAATTATTGCTAGAACTGTTTCATGAATATTGTAATGTTATTTTCACAAAG          | 357 |
| PK3        | TTTGACA <b>AA</b> TT <b>CATT</b> ATTGCTAGAACTGTTTCATGAATATTGTAATGTTATTTTCACAAAG | 356 |
| RBR        | TTTGACA <b>AA</b> TT <b>CATT</b> ATTGCTAGAACTGTTTCATGAATATTGTAATGTTATTTTCACAAAG | 346 |
| HCS        | TTTGACA <b>AA</b> TT <b>CATT</b> ATTGCTAGAACTGTTTCATGAATATTGTAATGTTATTTTCACAAAG | 358 |
| PK2        | TTTGACA <b>AA</b> TT <b>CATT</b> ATTGCTAGAACTGTTTCATGAATATTGTAATGTTATTTTCACAAAG | 355 |
|            | *****                                                                           |     |

(B)

|            | SBF-1                                                                  |     |
|------------|------------------------------------------------------------------------|-----|
| JHN        | CTTT <b>GCGTGGTTAATAAT</b> CTCTTTTGTGATAACTATAATAAATCAAACTCGTGAATCCAAC | 418 |
| ARC10550   | CTTT <b>GCGTGGTTAATAAT</b> CTCTTTTGTGATAACTATAATAAATCAAACTCGTGAATCCAAC | 413 |
| ASD7       | CTTT <b>GCGTGGTTAATAAT</b> CTCTTTTGTGATAACTATAATAAATCAAACTCGTGAATCCAAC | 413 |
| TN1        | CTTT <b>GCGTGGTTAATAAT</b> CTCTTTTGTGATAACTATAATAAATCAAACTCGTGAATCCAAC | 416 |
| PTB33      | CTTT <b>GCGTGGTTAATAAT</b> CTCTTTTGTGATAACTATAATAAATCAAACTCGTGAATCCAAC | 413 |
| RH         | CTTT <b>GCGTGGTTAATAAT</b> CTCTTTTGTGATAACTATAATAAATCAAACTCGTGAATCCAAC | 415 |
| IL162      | CTTT <b>GCGTGGTTAATAAT</b> CTCTTTTGTGATAACTATAATAAATCAAACTCGTGAATCCAAC | 416 |
| IL302      | CTTT <b>GCGTGGTTAATAAT</b> CTCTTTTGTGATAACTATAATAAATCAAACTCGTGAATCCAAC | 407 |
| IL308      | CTTT <b>GCGTGGTTAATAAT</b> CTCTTTTGTGATAACTATAATAAATCAAACTCGTGAATCCAAC | 417 |
| Mudgo      | CTTT <b>GCGTGGTTAATAAT</b> CTCTTTTGTGATAACTATAATAAATCAAACTCGTGAATCCAAC | 418 |
| Pokkali    | CTTT <b>GCGTGGTTAATAAT</b> CTCTTTTGTGATAACTATAATAAATCAAACTCGTGAATCCAAC | 400 |
| Nipponbare | CTT- <b>GCGTGGTTAATAAT</b> CTCTTTTGTGATAACTATAATAAATCAAACTCGTGAATCCAAC | 402 |
| IL143      | CTTT <b>GCGTGGTTAATAAT</b> CTCTTTTGTGATAACTATAATAAATCAAACTCGTGAATCCAAC | 417 |
| PK3        | CTTT <b>GCGTGGTTAATAAT</b> CTCTTTTGTGATAACTATAATAAATCAAACTCGTGAATCCAAC | 416 |
| RBR        | CTTT <b>GCGTGGTTAATAAT</b> CTCTTTTGTGATAACTATAATAAATCAAACTCGTGAATCCAAC | 406 |
| HCS        | CTTT <b>GCGTGGTTAATAAT</b> CTCTTTTGTGATAACTATAATAAATCAAACTCGTGAATCCAAC | 418 |
| PK2        | CTTT <b>GCGTGGTTAATAAT</b> CTCTTTTGTGATAACTATAATAAATCAAACTCGTGAATCCAAC | 415 |
|            | *** *                                                                  |     |

(C)

```

      P
JHN      CAACCAACCAGAGATCGGAAGAATGGATGAGGAAGAGAGCTGACGAGCTCAAGGAGAAAAGTCCG 478
ARC10550 CAACCAACCAGAGATCGGAAGAATGGATGAGGAAGAGAGCTGACGAGCTCAAGGAGAAAAGTCCG 473
ASD7     CAACCAACCAGAGATCGGAAGAATGGATGAGGAAGAGAGCTGACGAGCTCAAGGAGAAAAGTCCG 473
TN1      CAACCAACCAGAGATCGGAAGAATGGATGAGGAAGAGAGCTGACGAGCTCAAGGAGAAAAGTCCG 476
PTB33    CAACCAACCAGAGATCGGAAGAATGGATGAGGAAGAGAGCTGACGAGCTCAAGGAGAAAAGTCCG 473
RH       CAACCAACCAGAGATCGGAAGAATGGATGAGGAAGAGAGCTGACGAGCTCAAGGAGAAAAGTCCG 475
IL162    CAACCAACCAGAGATCGGAAGAATGGATGAGGAAGAGAGCTGACGAGCTCAAGGAGAAAAGTCCG 476
IL302    CAACCAACCAGAGATCGGAAGAATGGATGAGGAAGAGAGCTGACGAGCTCAAGGAGAAAAGTCCG 467
IL308    CAACCAACCAGAGATCGGAAGAATGGATGAGGAAGAGAGCTGACGAGCTCAAGGAGAAAAGTCCG 477
Mudgo    CAACCAACCAGAGATCGGAAGAATGGATGAGGAAGAGAGCTGACGAGCTCAAGGAGAAAAGTCCG 478
Pokkali  CAACCAACCAGAGATCGGAAGAATGGATGAGGAAGAGAGCTGACGAGCTCAAGGAGAAAAGTCCG 460
Nipponbare CAACCAACCAGAGATCGGAAGAATGGATGAGGAAGAGAGCTGACGAGCTCAAGGAGAAAAGTCCG 462
IL143    CAACCAACCAGAGATCGGAAGAATGGATGAGGAAGAGAGCTGACGAGCTCAAGGAGAAAAGTCCG 477
PK3      CAACTAACCCAGAGATCGGAAGAATGGATGAGGAAGAGAGCTGACGAGCTCAAGGAGAAAAGTCCG 476
RBR      CAACTAACCCAGAGATCGGAAGAATGGATGAGGAAGAGAGCTGACGAGCTCAAGGAGAAAAGTCCG 466
HCS      CAACTAACCCAGAGATCGGAAGAATGGATGAGGAAGAGAGCTGACGAGCTCAAGGAGAAAAGTCCG 478
PK2      CAACTAACCCAGAGATCGGAAGAATGGATGAGGAAGAGAGCTGACGAGCTCAAGGAGAAAAGTCCG 475
*****

```

**Supplementary Figure S1. Association between 4SNP at 5'upstream and expression of OsSTPS2 in 18 rice cultivars.** Sequence alignment at ATHB-1 (A), SBF-1 (B) and P (C) transcription factor binding sites, consensus sequence of these elements are labeled in red color. The SNPs found in each element are labeled in blue color.

(A)

```
KD          AAACTGTCCACCTACTATCTCCAGGAAGCCAAATGGTCACACCAGAGGCATAAACCAAGC
PK3         AAACTGTCCACCTACTATCTCCAGGAAGCCAAATGGTCACACCAGAGGCATAAACCAAGC
HCS         AAACTGTCCACCTACTATCTCCAGGAAGCCAAATGGTCACACCAGAGGCATAAACCAAGC
PK2         AAACTGTCCACCTACTATCTCCAGGAAGCCAAATGGTCACACCAGAGGCATAAACCAAGC
RBR         AAACTGTCCACCTACTATCTCCAGGAAGCCAAATGGTCACACCAGAGGCATAAACCAAGC
Mudgo      AAACTGTCCACCTACTATCTCCAGGAAGCTGAA-----CCAAGC
TN1         AAACTGTCCACCTACTATCTCCAGGAAGCTGAA-----CCAAGC
Pokkali    AAACTGTCCACCTACTATCTCCAGGAAGCTGAA-----CCAAGC
ARC10550   AAACTGTCCACCTACTATCTCCAGGAAGCTGAA-----CCAAGC
ASD7       AAACTGTCCACCTACTATCTCCAGGAAGCTGAA-----CCAAGC
JHN        AAACTGTCCACCTACTATCTCCAGGAAGCTGAA-----CCAAGC
PTB33      AAACTGTCCACCTACTATCTCCAGGAAGCTGAATGGTCACACCAGAGGCATAAACCAAGC
IL308      AAACTGTCCACCTACTATCTCCAGGAAGCTGAATGGTCACACCAGAGGCATAAACCAAGC
IL143      AAACTGTCCACCTACTATCTCCAGGAAGCTGAATGGTCACACCAGAGGCATAAACCAAGC
IL162      AAACTGTCCACCTACTATCTCCAGGAAGCTGAATGGTCACACCAGAGGCATAAACCAAGC
IL302      AAACTGTCCACCTACTATCTCCAGGAAGCTGAATGGTCACACCAGAGGCATAAACCAAGC
Nipponbare AAACTGTCCACCTACTATCTCCAGGAAGCTGAA-----CCAAGC
*****
```

(B)

```
KD          AAGCTGAA-----CCAAGCTTCGGTGACCAGATTACTTT
JHN         AAGCTGAA-----CCAAGCTTCGGTGACCAGATTACTTT
TN1         AAGCTGAA-----CCAAGCTTCGGTGACCAGATTACTTT
Mudgo      AAGCTGAA-----CCAAGCTTCGGTGACCAGATTACTTT
Pokkali    AAGCTGAA-----CCAAGCTTCGGTGACCAGATTACTTT
ARC10550   AAGCTGAA-----CCAAGCTTCGGTGACCAGATTACTTT
ASD7       AAGCTGAA-----CCAAGCTTCGGTGACCAGATTACTTT
Nipponbare AAGCTGAA-----CCAAGCTTCGGTGACCAGATTACTTT
IL143      AAGCTGAATGGTCACACCAGAGGCATAAACCAAGCTTCGGTGACCAGATTACTTT
IL302      AAGCTGAATGGTCACACCAGAGGCATAAACCAAGCTTCGGTGACCAGATTACTTT
IL162      AAGCTGAATGGTCACACCAGAGGCATAAACCAAGCTTCGGTGACCAGATTACTTT
PTB33      AAGCTGAATGGTCACACCAGAGGCATAAACCAAGCTTCGGTGACCAGATTACTTT
PL2        AAGCTGAATGGTCACACCAGAGGCATAAACCAAGCTTCGGTGACCAGATTACTTT
IL308      AAGCTGAATGGTCACACCAGAGGCATAAACCAAGCTTCGGTGACCAGATTACTTT
RH         AAGCTGAATGGTCACACCAGAGGCATAAACCAAGCTTCGGTGACCAGATTACTTT
*****
```

(C)

```
JHN          EFQKLSTYYLQEA-----PSFGDQITLTAMSSVIPL
TN1          EFQKLSTYYLQEA-----PSFGDQITLTAMSSVIPL
Mudgo       EFQKLSTYYLQEA-----PSFGDQITLTAMSSVIPL
Pokkali     EFQKLSTYYLQEA-----PSFGDQITLTAMSSVIPL
ARC10550    EFQKLSTYYLQEA-----PSFGDQITLTAMSSVIPL
ASD7        EFQKLSTYYLQEA-----PSFGDQITLTAMSSVIPL
Nipponbare  EFQKLSTYYLQEA-----PSFGDQITLTAMSSVIPL
IL143       EFQKLSTYYLQEAESHQRHKPSFGDQITLTAMSSVIPL
IL302       EFQKLSTYYLQEAESHQRHKPSFGDQITLTAMSSVIPL
IL162       EFQKLSTYYLQEAESHQRHKPSFGDQITLTAMSSVIPL
PTB33       EFQKLSTYYLQEAESHQRHKPSFGDQITLTAMSSVIPL
PL2         EFQKLSTYYLQEAESHQRHKPSFGDQITLTAMSSVIPL
IL308       EFQKLSTYYLQEAESHQRHKPSFGDQITLTAMSSVIPL
RH          EFQKLSTYYLQEAESHQRHKPSFGDQITLTAMSSVIPL
*****
```

**Supplementary Figure S2. Sequence alignment analysis.** genomic (A), cDNA (B), amino acid (C) sequence alignments of 2SNPs, 21-bp, and 7-amino acid deletion respectively in several rice cultivars. A; The TG/CA SNPs in exon 5 genomic DNA is labeled by blue/red color. B and C; the rice cultivars with 21-bp and 7-amino-acid deletion are labeled in red color.
